# Supplementary material for: Sertraline, Paroxetine, and Chlorpromazine Are Rapidly Acting Anthelmintic Drugs Capable of Clinical Repurposing
Source: PubMed Central journal article supplement (PMC5772060; doi:10.1038/s41598-017-18457-w), 2018-01-17
Supplement: 41598_2017_18457_MOESM1_ESM.pdf [file 41598_2017_18457_MOESM1_ESM.pdf]

1 **Title: Sertraline, Paroxetine, and Chlorpromazine Are Rapidly Acting Anthelmintic**  
 2 **Drugs Capable of Clinical Repurposing.**

3 **Authors:** Janis C. Weeks<sup>1</sup>, William M. Roberts<sup>1</sup>, Caitlyn Leasure<sup>2</sup>, Brian M. Suzuki<sup>3</sup>,  
 4 Kristin J. Robinson<sup>1</sup>, Heather Currey<sup>4</sup>, Phurpa Wangchuk<sup>5</sup>, Ramon M. Eichenberger<sup>5</sup>,  
 5 Aleen D. Saxton<sup>4</sup>, Thomas D. Bird<sup>4,6,7,8</sup>, Brian C. Kraemer<sup>4,7,9,10</sup>, Alex Loukas<sup>5</sup>, John M.  
 6 Hawdon<sup>2</sup>, Conor R. Caffrey<sup>3</sup>, and Nicole F. Liachko<sup>4,9\*</sup>

7 **Supplemental Information:**

8 **Supplementary Table S1. Drugs with anthelmintic bioactivity in *C. elegans***  
 9

| Compound           | Clinical Use               | Administration               | Mechanism                                                                                           |
|--------------------|----------------------------|------------------------------|-----------------------------------------------------------------------------------------------------|
| Chlorpromazine     | anti-psychotic             | oral, injection, intravenous | dopamine receptor antagonist                                                                        |
| Demeclocycline     | anti-biotic                | oral                         | tetracycline family member; inhibits protein synthesis                                              |
| Econazole Nitrate  | anti-fungal                | topical, suppository         | imidazole class molecule; inhibits synthesis of ergosterol thereby disrupting fungal cell membranes |
| Flecainide         | anti-arrhythmia            | oral                         | sodium channel blocker                                                                              |
| Floxuridine        | anti-cancer                | intra-arterial infusion      | pyrimidine analog; inhibits the S-phase of cell division                                            |
| Fludarabine        | anti-cancer                | intravenous, oral            | purine analog; inhibits DNA synthesis                                                               |
| 5-Fluorouracil     | anti-cancer                | intravenous, topical         | pyrimidine analog; irreversibly inhibits thymidylate synthase                                       |
| Hexachlorophene    | anti-bacterial             | topical                      | inhibits bacterial electron transport chain of gram-positive bacteria                               |
| Miconazole Nitrate | anti-fungal, anti-parasite | topical, oral                | imidazole class molecule; inhibits synthesis of ergosterol thereby disrupting fungal cell membranes |
| Minocycline        | anti-biotic                | oral, injection, intravenous | tetracycline family member; inhibits protein synthesis                                              |
| Paroxetine         | anti-depressant            | oral                         | selective serotonin reuptake inhibitor                                                              |
| Sertraline         | anti-depressant            | oral                         | selective serotonin reuptake inhibitor                                                              |
| Triclosan          | anti-bacterial             | topical                      | inhibits bacterial fatty acid synthesis                                                             |

10 **Supplementary Table S2. *C. elegans* developmental stages 48 h after drug**  
11 **exposure**

12

| [Drug], $\mu$ M  | Sertraline | Paroxetine | Chlorpromazine |
|------------------|------------|------------|----------------|
| 0 (DMSO control) | L4         | L4         | L4             |
| 10               | L2         | L2         | L2/L3          |
| 25               | L1/L2      | L2         | L2             |
| 50               | L1/L2      | L1/L2      | L2             |
| 75               | L1         | L1         | L1/L2          |
| 100              | L1         | L1         | L1/L2          |
| 125              | L1         | L1         | L1             |
| 150              | L1         | L1         | L1             |

13

14 Developmental stage(s) of the entire tested *C. elegans* population (live and dead) were  
15 assessed 48 h after being plated as embryos on agar that contained sertraline,  
16 paroxetine or chlorpromazine at the indicated concentrations (see Figure 1A). “L”  
17 denotes larval stage.  $N > 80$  worms per group.

18

19  
20

**Supplementary Table S3. Candidate anthelmintic pathway genes tested.**

| <i>C. elegans</i> gene               | Mutation tested     | Human homolog | Function/Resistance              | SRT effect | PXT effect | CPZ effect |
|--------------------------------------|---------------------|---------------|----------------------------------|------------|------------|------------|
| <b>Anthelmintic Resistance Genes</b> |                     |               |                                  |            |            |            |
| <i>acr-23</i>                        | ok2804              | CHRNA6        | monepantel resistant             | N          | N          | N          |
| <i>avr-14; avr-15; glc-1</i>         | ad1305; vu227; pk54 | GLRA2/3       | ivermectin resistant             | N          | N          | N          |
| <i>ben-1</i>                         | e1880               | TUBB4B        | benzimidazole resistant          | N          | N          | N          |
| <i>bre-1</i>                         | ye4                 | GMDS          | BT toxin resistant               | N          | N          | N          |
| <i>slo-1</i>                         | js379               | KCNMA1        | emodepside resistant             | N          | S          | N          |
| <i>unc-29</i>                        | e193                | CHRNA4        | levamisole resistant             | N          | N          | N          |
| <i>unc-50</i>                        | e306                | UNC50         | levamisole resistant             | N          | S          | S          |
| <b>Dopamine Signaling</b>            |                     |               |                                  |            |            |            |
| <i>cat-2</i>                         | e1112               | TH            | dopamine biosynthesis            | S          | S          | S          |
| <i>dat-1</i>                         | ok157               | DAT           | dopamine transporter             | N          | N          | N          |
| <i>dop-2; dop-3</i>                  | vs105; vs106        | DRD2          | dopamine D2 receptor             | N          | N          | N          |
| <b>Octopamine Signaling</b>          |                     |               |                                  |            |            |            |
| <i>ser-3</i>                         | ok2007 ad1774       | ADRA1A        | octopamine receptor              | N          | N          | N          |
| <i>tbh-1</i>                         | n3247               | DBH           | tyramine beta-hydroxylase        | N          | N          | N          |
| <b>Serotonin Signaling</b>           |                     |               |                                  |            |            |            |
| <i>glr-1</i>                         | n2641               | GRIA1         | AMPA receptor                    | N          | N          | N          |
| <i>nrf-5</i>                         | sa513               | -             | fluoxetine resistant             | N          | N          | N          |
| <i>nrf-6</i>                         | sa525               | -             | fluoxetine resistant             | N          | S          | N          |
| <i>mod-1</i>                         | ok103               | GABRB3        | serotonin gated chloride channel | N          | N          | N          |
| <i>mod-5</i>                         | n822                | SCL6A4        | serotonin transporter            | S          | S          | N          |
| <i>ser-4</i>                         | ok512               | HTR1D2        | G-protein coupled receptors      | N          | N          | N          |
| <i>ser-7; ser-1</i>                  | tm1325; ok345       | HTR7; HTR2    | G-protein coupled receptor       | N          | N          | N          |
| <i>tph-1</i>                         | n4622               | TPH2          | serotonin biosynthesis           | N          | N          | N          |
| <b>Tyramine Signaling</b>            |                     |               |                                  |            |            |            |
| <i>ser-2</i>                         | pk1357              | HTR1A         | tyramine receptor                | N          | N          | N          |
| <i>tdc-1</i>                         | n3419               | DDC           | tyrosine decarboxylase           | N          | N          | N          |

21

22

23

24

25

26

27

Effect of drug treatment on mutant worms relative to wild-type *C. elegans*. Each drug was tested at 25  $\mu$ M, 50  $\mu$ M, 100  $\mu$ M and 150  $\mu$ M in duplicate wells, and each experiment was repeated at least twice. *N* = 50-100 worms/ well. Mutant worm development, motility and survival were compared to that of wild-type worms at the same concentrations of drug. SRT, sertraline; PXT, paroxetine; CPZ, chlorpromazine. S, sensitive (increased mutant lethality relative to wild-type); N, no difference between

28 wild-type and mutant responses; R, resistance (decreased mutant lethality relative to  
29 wild-type).  
30
